# Supplementary material for: Pregnancy-associated breast cancers are driven by differences in adipose stromal cells present during lactation
Source: PubMed Central journal article supplement (PMC3978436; doi:10.1186/bcr3594), 2014-01-09

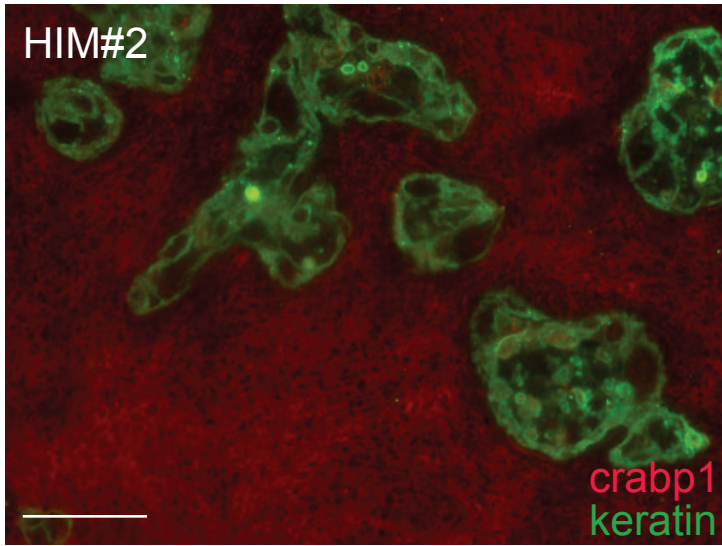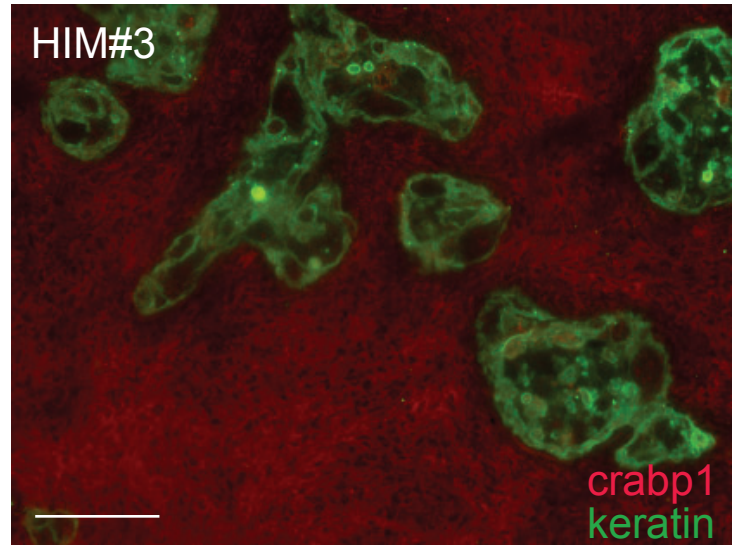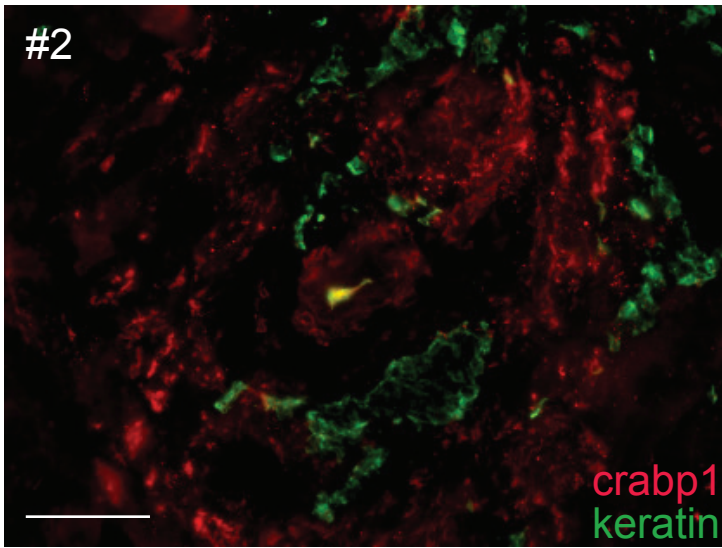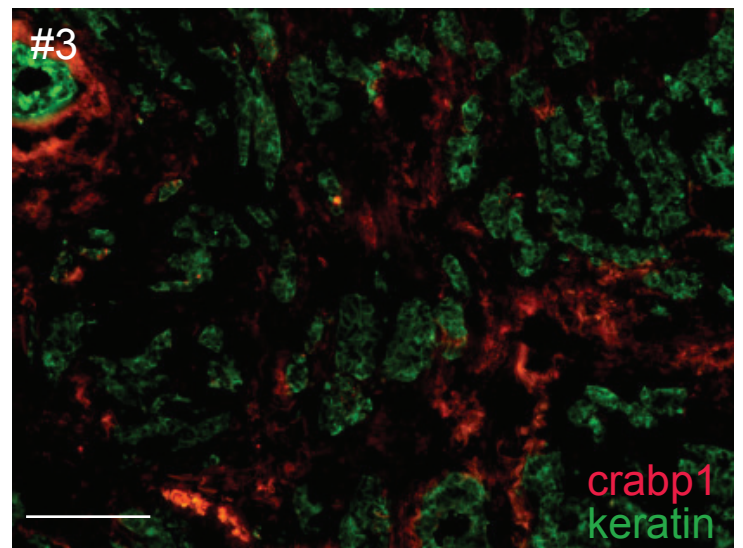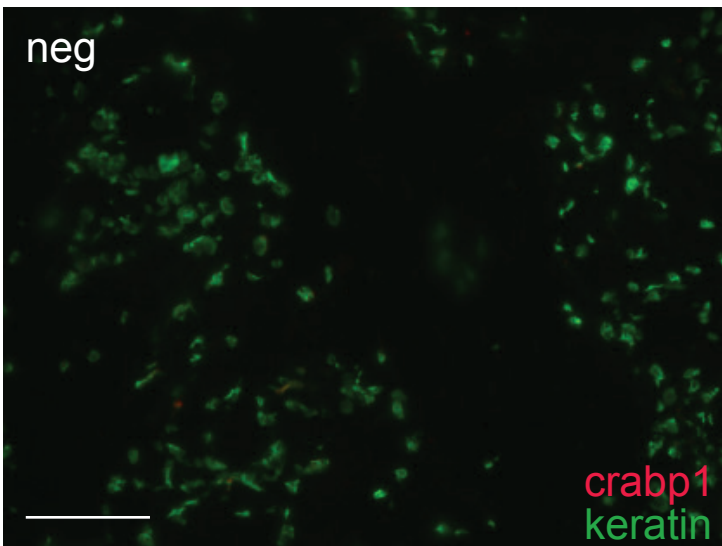

Supplement: bcr3594-S16.pdf [file bcr3594-S16.pdf]
